# Supplementary material
Source: PubMed Central journal article supplement (PMC4145530)

Figure S1

**A.**

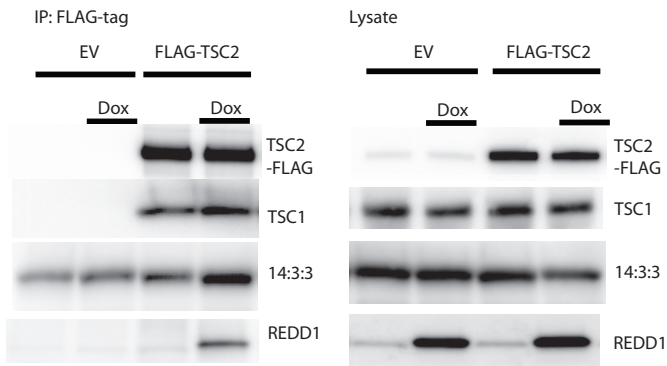

**B.**

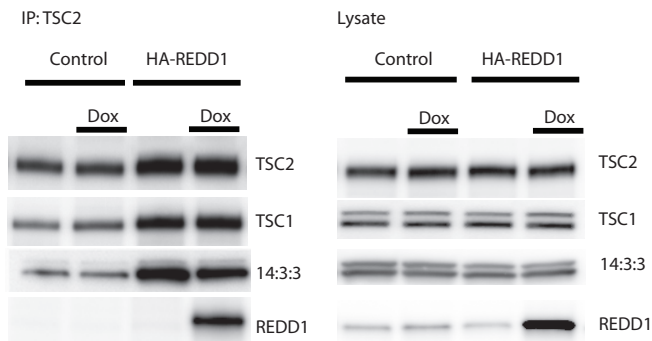

**C.**

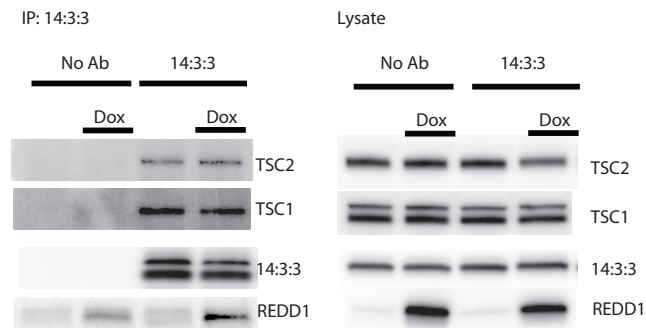

Figure S2

**A.**

HEK293 Tet-On HA-REDD1

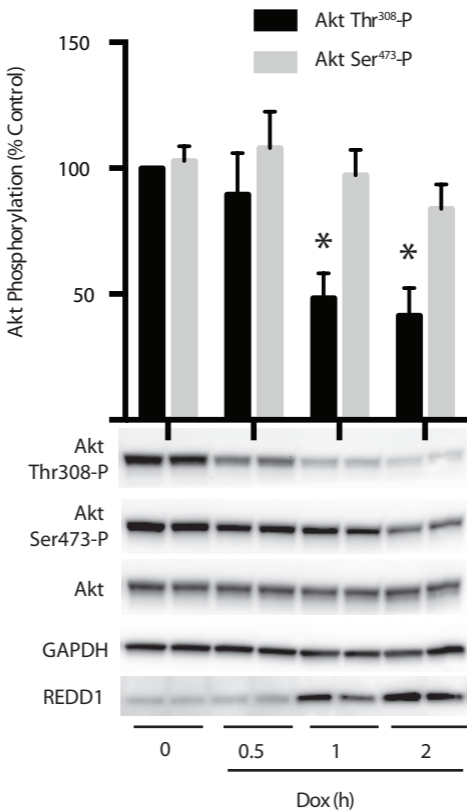

**B.**

HEK293 Control

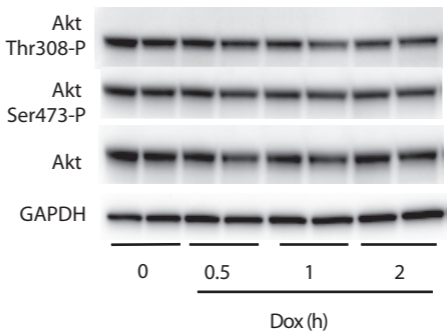

Figure S3

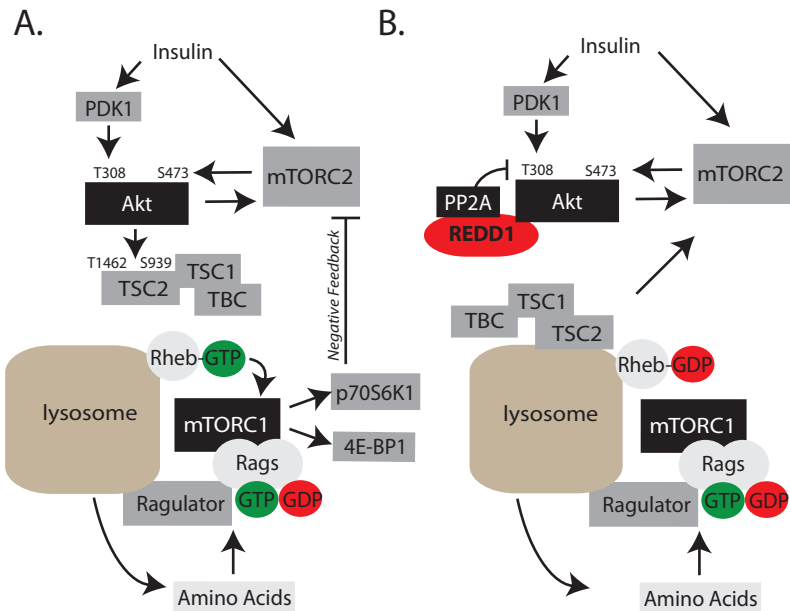

Supplement: NIHMS612020-supplement-Supplementary_Figures.pdf [file NIHMS612020-supplement-Supplementary_Figures.pdf]
